# Supplementary material for: Continuous cropping system altered soil microbial communities and nutrient cycles
Source: Frontiers journal article supplement (doi:10.3389/fmicb.2024.1374550), 2024-04-12
Supplement: Data_Sheet_1.pdf [file Data_Sheet_1.pdf]

| Environmental factor | Bacterial community |         |        |           | Fungal community |         |        |           |
|----------------------|---------------------|---------|--------|-----------|------------------|---------|--------|-----------|
|                      | R <sup>2</sup>      | P-value | Unique | I.perc(%) | R <sup>2</sup>   | P-value | Unique | I.perc(%) |
| pH                   | 0.859               | 0.008   | 0.061  | 31.90     | 0.957            | 0.001   | 0.064  | 65.11     |
| SOC                  | 0.751               | 0.013   | 0.123  | 10.69     | 0.842            | 0.004   | 0.206  | 83.02     |
| AP                   | 0.300               | 0.327   | 0.06   | -6.17     | 0.658            | 0.041   | 0.065  | 16.04     |
| AK                   | 0.927               | 0.003   | 0.287  | 27.27     | 0.671            | 0.037   | 0.031  | 0.50      |
| AN                   | 0.604               | 0.069   | 0.311  | 36.31     | 0.278            | 0.405   | -0.042 | -32.88    |

**Supplemental Table S1.** Redundancy analysis (RDA) of effects of different environmental factors on soil microbial community. Environmental factors including pH, soil organic carbon (SOC), available phosphorus (AP), available potassium (AK), and alkeline nitrogen (AN). The relative importance of each explanatory variable independently accounting for total variations was quantified for the total variations was qualified by applying the hierarchy algorithm. Unique: each explanatory variable independently accounting for total variations. I.perc(%): individual effect divided by total adjusted R<sup>2</sup> found in column Individual importance.

**Supplemental Table S2.** Alpha diversity indexes of bacterial and fungal communities under long-term continuous cropping.

| Treatment | Bacteria |         |           |           | Fungi   |         |          |          |
|-----------|----------|---------|-----------|-----------|---------|---------|----------|----------|
|           | Shannon  | Simpson | Ace       | Chao1     | Shannon | Simpson | Ace      | Chao1    |
| CK        | 8.798a   | 0.990a  | 1774.719a | 1805.053a | 5.398a  | 0.931a  | 466.179a | 485.739a |
| Y5        | 8.961a   | 0.992a  | 1842.663a | 1879.089a | 5.151a  | 0.924a  | 513.141a | 531.254a |
| Y20       | 8.744a   | 0.989a  | 1869.586a | 1902.928a | 5.496a  | 0.951a  | 463.895a | 482.369a |

CK: tobacco cropping for 0 years. Y5: continuous tobacco cropping for 5 years. Y20:

continuous tobacco cropping for 20 years. Different letters indicate significant

differences among the three treatments tested by one-way ANOVA ( $P < 0.05$ ).

**Supplemental Figure S1.** Major variations in the bacterial (A) and fungal (B) communities in different continuous tobacco cropping soil detected by the PCA of the OTUs.
